# Supplementary material for: Quyushengxin Formula Causes Differences in Bacterial and Phage Composition in Ulcerative Colitis Patients
Source: Hindawi journal article supplement (doi:10.1155/2020/5859023), 2020-01-01
Supplement: f1 [file 5859023.f1.pdf]

## Supplementary materials

Fig S1 Analysis of the QYSX effect on UC by endoscopy.

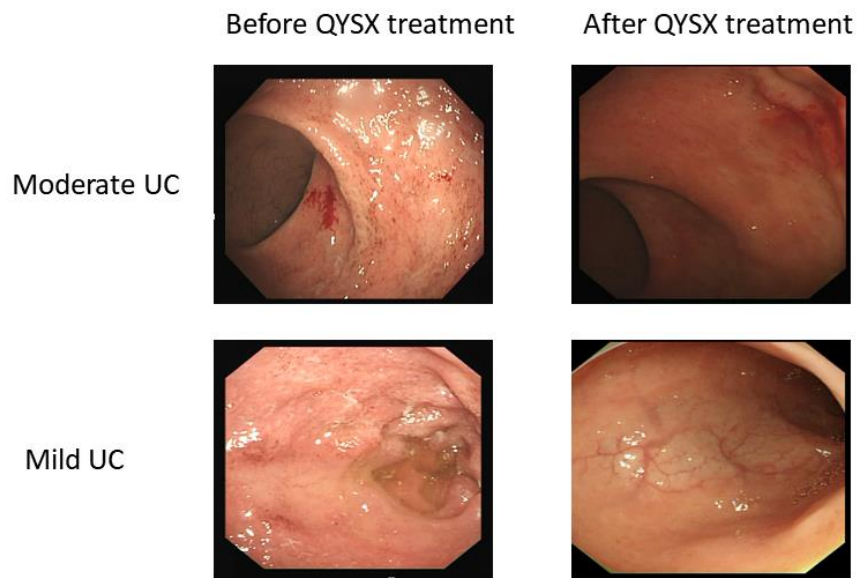

Fig S2 STAMP analysis of gut microbiome in UC patients before and after treatment.

Note: b, UC patients before QYSX treatment; c, UC patients after QYSX treatment.

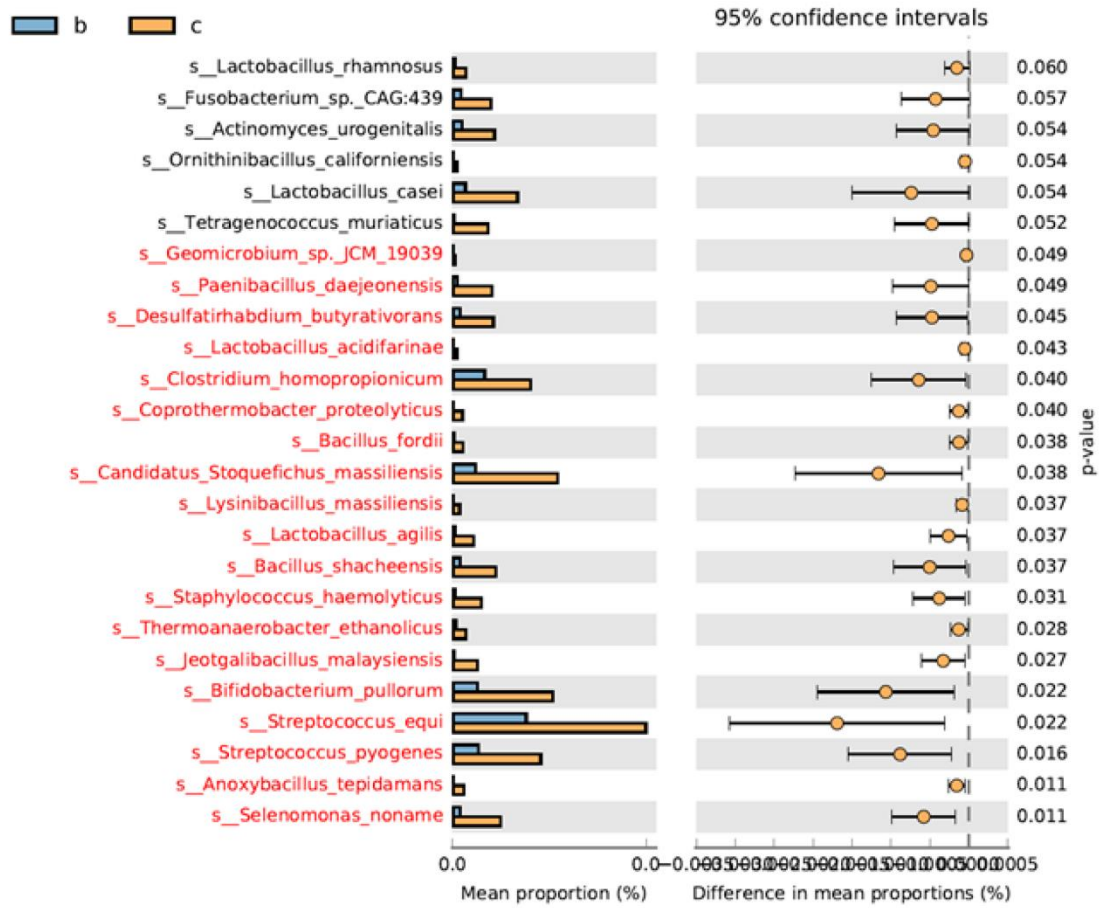

Fig S3 Venn diagram shows the unique and shared GO terms enrich in healthy control (a) and UC patients before (b) and after (c) QYSX treatment.

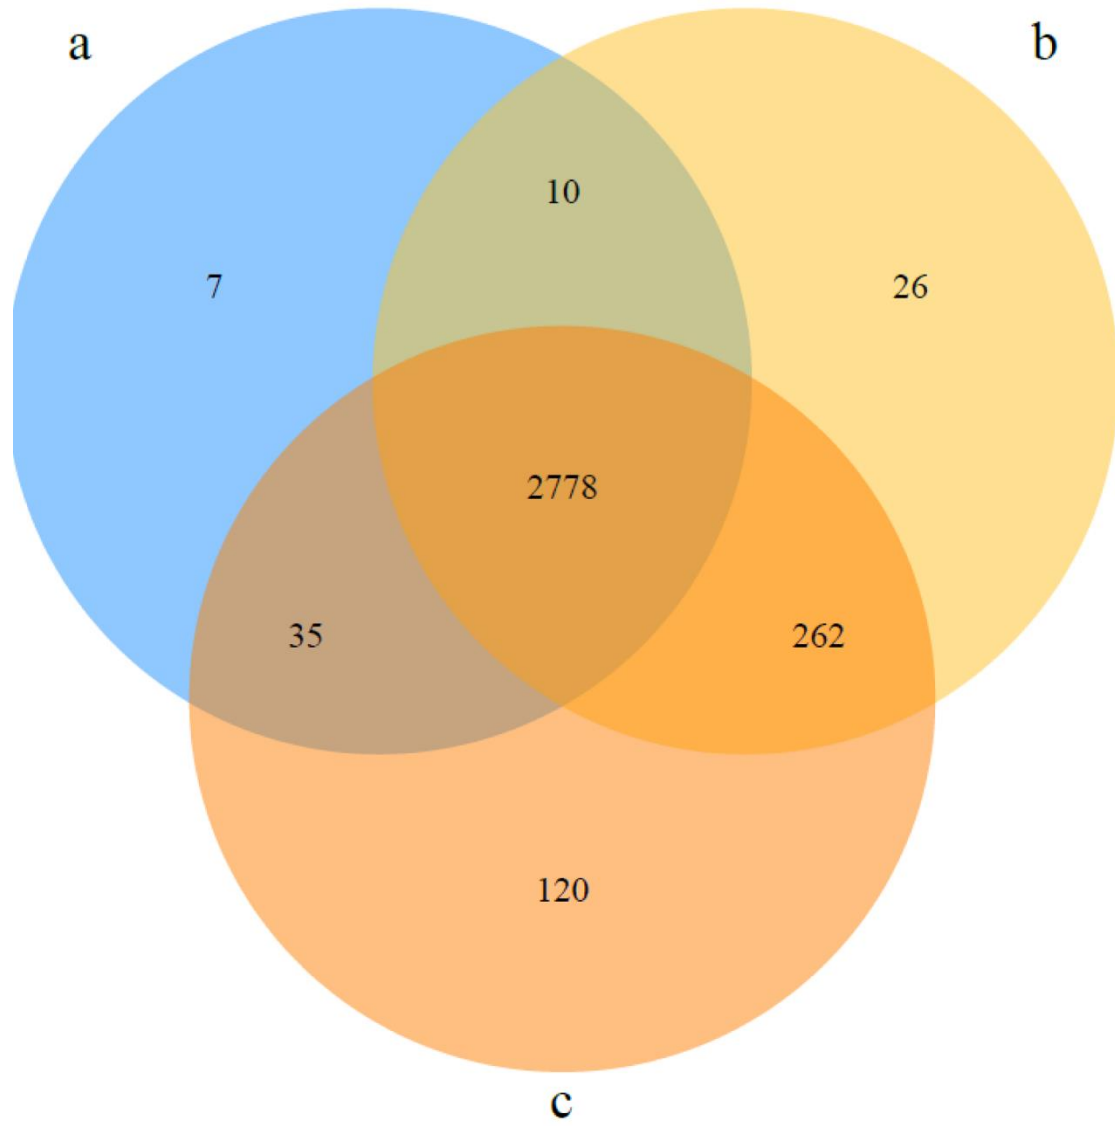

**Table S1** Information of UC patients.

| Parameters                    | Classification | Numbers | P value |
|-------------------------------|----------------|---------|---------|
| gender                        | female         | 4       |         |
|                               | male           | 4       | ---     |
| Montreal classification       | E1             | 3       |         |
|                               | E2             | 2       | ---     |
|                               | E3             | 3       |         |
| Mayo score (before treatment) | 5              | 3       |         |
|                               | 7              | 1       |         |
|                               | 8              | 3       | 0.0006  |
|                               | 9              | 1       |         |
| Mayo score (after treatment)  | 3              | 1       |         |
|                               | 4              | 5       |         |
|                               | 5              | 2       |         |
